# Supplementary material for: Identification and characterization of the novel Col10a1 regulatory mechanism during chondrocyte hypertrophic differentiation
Source: PubMed Central journal article supplement (PMC4649528; doi:10.1038/cddis.2014.444), 2014-10-16
Supplement: cddis2014444x1.pdf [file cddis2014444x1.pdf]

## TFSEARCH Search Result

\*\* TFSEARCH ver.1.3 \*\* (c)1995 Yutaka Akiyama (Kyoto Univ.)

This simple routine searches highly correlated sequence fragments versus TFMATRIX transcription factor binding site profile database by E.Wingender, R.Knueppel, P.Dietze, H.Karas (GBF-Braunschweig).

<Warning> Scoring scheme is so straightforward in this version.  
 $\text{score} = 100.0 * (\text{'weighted sum'} - \text{min}) / (\text{max} - \text{min})$   
 The score does not properly reflect statistical significance!

Database: TRANSFAC MATRIX TABLE, Rel.3.3 06-01-1998  
 Query: M150bpTFSearch (150 bases)  
 Taxonomy: Vertebrate  
 Threshold: 85.0 point

TFMATRIX entries with High-scoring:

|     |                                                        |                        |             |
|-----|--------------------------------------------------------|------------------------|-------------|
| 1   | GCCTCCTGTT TCACGTAGAA TAAGCTCCTT CATAAAGTCA CAGACCAGTC | entry                  | score       |
|     | <-----                                                 | <a href="#">M00100</a> | CdxA 96.2   |
|     | <-----                                                 | <a href="#">M00041</a> | CRE-BP 87.2 |
|     | <-----                                                 | <a href="#">M00101</a> | CdxA 87.1   |
|     | <-----                                                 | <a href="#">M00101</a> | CdxA 85.7   |
| 51  | AGGCTGAACA GCTCCGAGGA AACACCCAGA ATAAAAATAG TTTAATACAC | entry                  | score       |
|     | <-----                                                 | <a href="#">M00101</a> | CdxA 92.9   |
|     | <-----                                                 | <a href="#">M00053</a> | c-Rel 91.7  |
|     | <-----                                                 | <a href="#">M00099</a> | S8 90.4     |
|     | <-----                                                 | <a href="#">M00148</a> | SRY 89.1    |
|     | <-----                                                 | <a href="#">M00052</a> | NF-kap 88.1 |
|     | <-----                                                 | <a href="#">M00101</a> | CdxA 85.7   |
|     | <-----                                                 | <a href="#">M00054</a> | NF-kap 85.4 |
|     | <-----                                                 | <a href="#">M00101</a> | CdxA 85.0   |
| 101 | ACAATTAGGT GTGGGTGTGG CCAGCAAATA CTCTGATTCT ACAATCTGTT | entry                  | score       |
|     | <-----                                                 | <a href="#">M00241</a> | Nkx-2. 91.2 |
|     | <-----                                                 | <a href="#">M00099</a> | S8 90.4     |
|     | <-----                                                 | <a href="#">M00073</a> | deltaE 87.4 |
|     | <-----                                                 | <a href="#">M00131</a> | HNF-3b 86.7 |

Total 15 high-scoring sites found.  
 Max score: 96.2 point, Min score: 85.0 point

[TRANSFAC database document \(Notice to users\)](#)

[TFMATRIX: binding site distribution matrix](#)

[Parallel Application Tsukuba Laboratory Home Page](#)

 [PAPIA system Top Page](#)



## Transcription factor Affinity Prediction (TRAP) Web Tools

[Home](#)  
[Cite](#)[TRAP](#)[PASTAA](#)[Gbrowse](#)[Help](#)[Authors](#)[Download](#)

## TRAP (single sequence)

calculating... please wait...the results will appear below

Sequence: **MCoIX\_150**

\* The table is ranked from the lowest to the highest p-value.

Results are displayed in the table below [\[save table\]](#).

## Affinity-based ranking of transcription factors

| Rank | P-value | Corrected p-value | Matrix ID | Matrix name   | Affinity Plot         | Binding Sites         |
|------|---------|-------------------|-----------|---------------|-----------------------|-----------------------|
| 1    | 0.00153 | 0.737             | M00395    | V\$HOXA3_01   | <a href="#">Graph</a> | <a href="#">Sites</a> |
| 2    | 0.00317 | 0.737             | M01440    | V\$LHX8_01    | <a href="#">Graph</a> | <a href="#">Sites</a> |
| 3    | 0.00327 | 0.737             | M01331    | V\$ISX_01     | <a href="#">Graph</a> | <a href="#">Sites</a> |
| 4    | 0.00406 | 0.737             | M01421    | V\$LHX4_01    | <a href="#">Graph</a> | <a href="#">Sites</a> |
| 5    | 0.00526 | 0.737             | M00403    | V\$AMEF2_Q6   | <a href="#">Graph</a> | <a href="#">Sites</a> |
| 6    | 0.00646 | 0.737             | M00150    | V\$BRACH_01   | <a href="#">Graph</a> | <a href="#">Sites</a> |
| 7    | 0.00675 | 0.737             | M01386    | V\$EVX2_01    | <a href="#">Graph</a> | <a href="#">Sites</a> |
| 8    | 0.0083  | 0.737             | M01371    | V\$GBX1_01    | <a href="#">Graph</a> | <a href="#">Sites</a> |
| 9    | 0.00981 | 0.737             | M01113    | V\$CACD_01    | <a href="#">Graph</a> | <a href="#">Sites</a> |
| 10   | 0.0142  | 0.737             | M01162    | V\$OG2_01     | <a href="#">Graph</a> | <a href="#">Sites</a> |
| 11   | 0.0144  | 0.737             | M00640    | V\$HOXA4_Q2   | <a href="#">Graph</a> | <a href="#">Sites</a> |
| 12   | 0.0158  | 0.737             | M01339    | V\$PAX7_01    | <a href="#">Graph</a> | <a href="#">Sites</a> |
| 13   | 0.0175  | 0.737             | M01388    | V\$DLX5_01    | <a href="#">Graph</a> | <a href="#">Sites</a> |
| 14   | 0.018   | 0.737             | M00415    | V\$AREB6_04   | <a href="#">Graph</a> | <a href="#">Sites</a> |
| 15   | 0.019   | 0.737             | M00423    | V\$FOXJ2_Q2   | <a href="#">Graph</a> | <a href="#">Sites</a> |
| 16   | 0.0203  | 0.737             | M00133    | V\$TST1_01    | <a href="#">Graph</a> | <a href="#">Sites</a> |
| 17   | 0.0206  | 0.737             | M01019    | V\$TBX5_01    | <a href="#">Graph</a> | <a href="#">Sites</a> |
| 18   | 0.0213  | 0.737             | M01020    | V\$TBX5_Q2    | <a href="#">Graph</a> | <a href="#">Sites</a> |
| 19   | 0.0236  | 0.737             | M00100    | V\$CDXA_01    | <a href="#">Graph</a> | <a href="#">Sites</a> |
| 20   | 0.0236  | 0.737             | M00935    | V\$NFAT_Q4_Q1 | <a href="#">Graph</a> | <a href="#">Sites</a> |
| 21   | 0.0249  | 0.737             | M01037    | V\$GLI_Q2     | <a href="#">Graph</a> | <a href="#">Sites</a> |
| 22   | 0.0257  | 0.737             | M00821    | V\$NRF2_Q4    | <a href="#">Graph</a> | <a href="#">Sites</a> |
| 23   | 0.0265  | 0.737             | M00053    | V\$CREL_01    | <a href="#">Graph</a> | <a href="#">Sites</a> |
| 24   | 0.0272  | 0.737             | M00099    | V\$S8_01      | <a href="#">Graph</a> | <a href="#">Sites</a> |
| 25   | 0.0274  | 0.737             | M00250    | V\$GF1_01     | <a href="#">Graph</a> | <a href="#">Sites</a> |
| 26   | 0.0277  | 0.737             | M00486    | V\$PAX2_Q2    | <a href="#">Graph</a> | <a href="#">Sites</a> |
| 27   | 0.028   | 0.737             | M00231    | V\$MEF2_Q2    | <a href="#">Graph</a> | <a href="#">Sites</a> |
| 28   | 0.0329  | 0.737             | M01431    | V\$BARX2_01   | <a href="#">Graph</a> | <a href="#">Sites</a> |
| 29   | 0.0329  | 0.737             | M01301    | V\$MEF2_Q5    | <a href="#">Graph</a> | <a href="#">Sites</a> |

|    |        |       |        |                  |                       |                       |
|----|--------|-------|--------|------------------|-----------------------|-----------------------|
| 30 | 0.0348 | 0.737 | M01023 | V\$HSF1_Q6       | <a href="#">Graph</a> | <a href="#">Sites</a> |
| 31 | 0.0357 | 0.737 | M00246 | V\$EGR2_01       | <a href="#">Graph</a> | <a href="#">Sites</a> |
| 32 | 0.0365 | 0.737 | M00407 | V\$RSRFC4_Q2     | <a href="#">Graph</a> | <a href="#">Sites</a> |
| 33 | 0.037  | 0.737 | M01462 | V\$POU6F1_02     | <a href="#">Graph</a> | <a href="#">Sites</a> |
| 34 | 0.0374 | 0.737 | M01044 | V\$TBX5_Q5       | <a href="#">Graph</a> | <a href="#">Sites</a> |
| 35 | 0.0382 | 0.737 | M01349 | V\$HB9_01        | <a href="#">Graph</a> | <a href="#">Sites</a> |
| 36 | 0.0386 | 0.737 | M01446 | V\$BARHL2_01     | <a href="#">Graph</a> | <a href="#">Sites</a> |
| 37 | 0.0387 | 0.737 | M00026 | V\$RSRFC4_01     | <a href="#">Graph</a> | <a href="#">Sites</a> |
| 38 | 0.0388 | 0.737 | M00405 | V\$MMEF2_Q6      | <a href="#">Graph</a> | <a href="#">Sites</a> |
| 39 | 0.0403 | 0.737 | M01588 | V\$GKLF_02       | <a href="#">Graph</a> | <a href="#">Sites</a> |
| 40 | 0.041  | 0.737 | M01657 | V\$GLI3_Q5_01    | <a href="#">Graph</a> | <a href="#">Sites</a> |
| 41 | 0.0415 | 0.737 | M01292 | V\$HOXA13_01     | <a href="#">Graph</a> | <a href="#">Sites</a> |
| 42 | 0.0426 | 0.737 | M01422 | V\$LHX61_02      | <a href="#">Graph</a> | <a href="#">Sites</a> |
| 43 | 0.044  | 0.737 | M00991 | V\$CDX_Q5        | <a href="#">Graph</a> | <a href="#">Sites</a> |
| 44 | 0.0452 | 0.737 | M01332 | V\$BARHL1_01     | <a href="#">Graph</a> | <a href="#">Sites</a> |
| 45 | 0.046  | 0.737 | M01016 | V\$SOX17_01      | <a href="#">Graph</a> | <a href="#">Sites</a> |
| 46 | 0.0477 | 0.737 | M01436 | V\$CRX_02        | <a href="#">Graph</a> | <a href="#">Sites</a> |
| 47 | 0.0481 | 0.737 | M00292 | V\$FREAC4_01     | <a href="#">Graph</a> | <a href="#">Sites</a> |
| 48 | 0.0489 | 0.737 | M01212 | V\$STAT1STAT1_Q3 | <a href="#">Graph</a> | <a href="#">Sites</a> |
| 49 | 0.0509 | 0.737 | M00641 | V\$HSF_Q6        | <a href="#">Graph</a> | <a href="#">Sites</a> |
| 50 | 0.0518 | 0.737 | M01429 | V\$HOMEZ_01      | <a href="#">Graph</a> | <a href="#">Sites</a> |
| 51 | 0.0556 | 0.737 | M01239 | V\$RELB52_01     | <a href="#">Graph</a> | <a href="#">Sites</a> |
| 52 | 0.0559 | 0.737 | M01365 | V\$EN1_02        | <a href="#">Graph</a> | <a href="#">Sites</a> |
| 53 | 0.0566 | 0.737 | M00774 | V\$NFKB_Q6_01    | <a href="#">Graph</a> | <a href="#">Sites</a> |
| 54 | 0.0569 | 0.737 | M00052 | V\$NFKAPPAB65_01 | <a href="#">Graph</a> | <a href="#">Sites</a> |
| 55 | 0.0589 | 0.737 | M01455 | V\$EN2_01        | <a href="#">Graph</a> | <a href="#">Sites</a> |
| 56 | 0.061  | 0.737 | M00105 | V\$CDPCR3_01     | <a href="#">Graph</a> | <a href="#">Sites</a> |
| 57 | 0.0613 | 0.737 | M01399 | V\$HB24_01       | <a href="#">Graph</a> | <a href="#">Sites</a> |
| 58 | 0.0614 | 0.737 | M01325 | V\$LH2_01        | <a href="#">Graph</a> | <a href="#">Sites</a> |
| 59 | 0.063  | 0.737 | M01403 | V\$OTX3_01       | <a href="#">Graph</a> | <a href="#">Sites</a> |
| 60 | 0.063  | 0.737 | M01448 | V\$HOXD1_01      | <a href="#">Graph</a> | <a href="#">Sites</a> |
| 61 | 0.0631 | 0.737 | M01382 | V\$GBX2_01       | <a href="#">Graph</a> | <a href="#">Sites</a> |
| 62 | 0.0631 | 0.737 | M01355 | V\$ALX3_01       | <a href="#">Graph</a> | <a href="#">Sites</a> |
| 63 | 0.0633 | 0.737 | M00081 | V\$EVI1_04       | <a href="#">Graph</a> | <a href="#">Sites</a> |
| 64 | 0.0639 | 0.737 | M01384 | V\$RHGX11_02     | <a href="#">Graph</a> | <a href="#">Sites</a> |
| 65 | 0.0641 | 0.737 | M01330 | V\$HOXB3_01      | <a href="#">Graph</a> | <a href="#">Sites</a> |
| 66 | 0.0653 | 0.737 | M00251 | V\$XBP1_01       | <a href="#">Graph</a> | <a href="#">Sites</a> |
| 67 | 0.0659 | 0.737 | M00420 | V\$MEIS1AHOX9_01 | <a href="#">Graph</a> | <a href="#">Sites</a> |
| 68 | 0.0664 | 0.737 | M01458 | V\$CDX_Q5_01     | <a href="#">Graph</a> | <a href="#">Sites</a> |

**Result** [what is this?](#)[Return to Match](#)Match results filename : 

Save

Download

Matrix library : TRANSFAC MATRIX TABLE, Release 2013.1

Sequence file : 150.seq

Profile : vertebrate\_non\_redundant\_minFP.prf

Only high-quality matrices : YES

Cut-offs : Minimize false positives

Total sequence length : 150

Total sites number : 6

Frequency of sites : 0.040000

**manage your data:**

**Sequences:** uploaded sequences are automatically stored to your user account. You may delete sequences that you no longer need [here](#).

**Matrices:** the complete TRANSFAC matrix library is available for use with Match, but you may also choose to [Create or edit your own matrices](#). You may additionally [Compare your matrices](#) against the TRANSFAC matrix library

**Profiles:** a selection of commonly used profiles (collection of matrices) is made available for use with Match. Alternatively you may choose to [Create or edit your own profile](#), selecting from the matrices within the TRANSFAC matrix library as well as any custom matrices that you have created.

**Saved Match results:** each time a Match analysis is run you are given the option to save the results to your user account. You may view and manage your saved results [here](#).

Scanning sequence ID: 150.seq\_0 - View a [graphical output](#) of the following search resultShow  entries

| Matrix Id                    | Position(Strand) | Core Score | Matrix Score | Sequence         | Factor Name            |
|------------------------------|------------------|------------|--------------|------------------|------------------------|
| <a href="#">V\$TST1_01</a>   | 76 (+)           | 0.929      | 0.903        | ccaGAATAaaaatag  | <a href="#">Tst-1</a>  |
| <a href="#">V\$RSRFC4_Q2</a> | 78 (+)           | 1          | 0.905        | agaataaaAATAGtta | <a href="#">RSRFC4</a> |
| <a href="#">V\$FOXJ2_02</a>  | 81 (+)           | 0.897      | 0.905        | ataAAAATagttta   | <a href="#">FOXJ2</a>  |
| <a href="#">V\$OG2_01</a>    | 102 (-)          | 1          | 1            | cAATTA           | <a href="#">OG-2</a>   |
| <a href="#">V\$TBX5_01</a>   | 105 (+)          | 1          | 0.972        | ttaGGTGTgggt     | <a href="#">TBX5</a>   |
| <a href="#">V\$CACD_01</a>   | 113 (-)          | 1          | 1            | GGGTGtgg         | <a href="#">CACD</a>   |



# Mascot Search Results

**User** : Praneeth Edirisinghe  
**Email** :  
**Search title** : Ced 2  
**MS data file** : Ced\_new2.mgf  
**Database** : SwissProt 51.6 (257964 sequences; 93947433 residues)  
**Taxonomy** : Rodentia (Rodents) (19706 sequences)  
**Timestamp** : 10 Mar 2011 at 21:00:36 GMT  
**Enzyme** : Trypsin  
**Mass values** : Monoisotopic  
**Protein Mass** : Unrestricted  
**Peptide Mass Tolerance** : ± 2 Da  
**Fragment Mass Tolerance** : ± 1.5 Da  
**Max Missed Cleavages** : 3  
**Instrument type** : Default  
**Number of queries** : 9192  
**Protein hits** :

- [GDF7\\_MOUSE](#) Growth/differentiation factor 7 precursor (GDF-7) - Mus musculus (Mouse)
- [ALBU\\_MOUSE](#) Serum albumin precursor - Mus musculus (Mouse)
- [K2C1\\_MOUSE](#) Keratin, type II cytoskeletal 1 (Cytokeratin-1) (CK-1) (Keratin-1) (K1)
- [RALY\\_MOUSE](#) RNA-binding protein Raly (hnRNP associated with lethal yellow protein) (1
- [HRBL\\_MOUSE](#) HIV-1 Rev-binding protein-like protein (Rev/Rex activation domain-binding
- [ODPAT\\_RAT](#) Pyruvate dehydrogenase E1 component alpha subunit, testis-specific form,
- [ODPAT\\_MOUSE](#) Pyruvate dehydrogenase E1 component alpha subunit, testis-specific form,
- [FUS\\_MOUSE](#) RNA-binding protein FUS (Pigpen protein) - Mus musculus (Mouse)
- [SCN3A\\_RAT](#) Sodium channel protein type 3 subunit alpha (Sodium channel protein type
- [THNSL\\_MOUSE](#) Threonine synthase-like 1 - Mus musculus (Mouse)
- [SCRT2\\_MOUSE](#) Transcriptional repressor scratch 2 (Scratch homolog 2 zinc finger prote.
- [ADR1\\_MOUSE](#) Adiponectin receptor protein 1 - Mus musculus (Mouse)
- [NDUV2\\_MOUSE](#) NADH dehydrogenase [ubiquinone] flavoprotein 2, mitochondrial precursor
- [PTN21\\_RAT](#) Tyrosine-protein phosphatase non-receptor type 21 (EC 3.1.3.48) (Protein-
- [DC1L1\\_RAT](#) Cytoplasmic dynein 1 light intermediate chain 1 (Dynein light intermedia
- [PHX2A\\_MOUSE](#) Paired mesoderm homeobox protein 2A (Paired-like homeobox 2A) (PHOX2A ho
- [KT3K\\_MOUSE](#) Ketosamine-3-kinase (EC 2.7.1.-) (Fructosamine-3-kinase-related protein)
- [CONA1\\_MOUSE](#) Collagen alpha-1(XXIII) chain - Mus musculus (Mouse)
- [NFH\\_RAT](#) Neurofilament triplet H protein (200 kDa neurofilament protein) (Neurofi.
- [NEUG\\_MOUSE](#) Neurogranin (Ng) (RC3) - Mus musculus (Mouse)
- [SEM5A\\_MOUSE](#) Semaphorin-5A precursor (Semaphorin F) (Sema F) - Mus musculus (Mouse)
- [CD2L5\\_MOUSE](#) Cell division cycle 2-like protein kinase 5 (EC 2.7.11.22) (CDC2-related
- [CAC1H\\_RAT](#) Voltage-dependent T-type calcium channel subunit alpha-1H (Voltage-gated
- [MPIP1\\_RAT](#) M-phase inducer phosphatase 1 (EC 3.1.3.48) (Dual specificity phosphatas
- [RL14\\_MOUSE](#) 60S ribosomal protein L14 - Mus musculus (Mouse)
- [CAC1H\\_MOUSE](#) Voltage-dependent T-type calcium channel subunit alpha-1H (Voltage-gated
- [DPOD1\\_RAT](#) DNA polymerase delta catalytic subunit (EC 2.7.7.7) - Rattus norvegicus
- [BOREA\\_MOUSE](#) Borealin (Cell division cycle-associated protein 8) (MESrg) - Mus musculi
- [CBX6\\_MOUSE](#) Chromobox protein homolog 6 - Mus musculus (Mouse)
- [DOCK9\\_MOUSE](#) Dedicator of cytokinesis protein 9 (Cdc42 guanine nucleotide exchange fa
- [IL33\\_RAT](#) Interleukin-33 precursor (IL-33) - Rattus norvegicus (Rat)
- [RM36\\_MOUSE](#) 39S ribosomal protein L36, mitochondrial precursor (L36mt) (MRP-L36) - M
- [COBA1\\_MOUSE](#) Collagen alpha-1(XI) chain precursor - Mus musculus (Mouse)
- [EP15\\_MOUSE](#) Epidermal growth factor receptor substrate 15 (Protein Eps15) (AF-1p pro
- [PRP8\\_MOUSE](#) Pre-mRNA-processing-splicing factor 8 (Splicing factor Prp8) - Mus muscu
- [ALBU\\_RAT](#) Serum albumin precursor - Rattus norvegicus (Rat)
- [STAB1\\_MOUSE](#) Stabilin-1 precursor (FEEL-1 protein) - Mus musculus (Mouse)
- [HNF3A\\_MOUSE](#) Hepatocyte nuclear factor 3-alpha (HNF-3A) (Forkhead box protein A1) - M
- [TUB\\_MOUSE](#) Tubby protein - Mus musculus (Mouse)
- [TUB\\_RAT](#) Tubby protein homolog - Rattus norvegicus (Rat)
- [K0515\\_MOUSE](#) Uncharacterized protein KIAA0515 - Mus musculus (Mouse)
- [EPS8\\_MOUSE](#) Epidermal growth factor receptor kinase substrate 8 - Mus musculus (Mous
- [BAT2\\_RAT](#) Large proline-rich protein BAT2 (HLA-B-associated transcript 2) - Rattus
- [FZD8\\_MOUSE](#) Frizzled-8 precursor (Fz-8) (mFz8) - Mus musculus (Mouse)
- [FGRL1\\_MOUSE](#) Fibroblast growth factor receptor-like 1 precursor (FGF receptor-like pr
- [HRSL3\\_MOUSE](#) HRAS-like suppressor 3 (H-rev 107 protein) - Mus musculus (Mouse)
- [COBA2\\_MOUSE](#) Collagen alpha-2(XI) chain precursor - Mus musculus (Mouse)
- [3BHS1\\_MOUSE](#) 3 beta-hydroxysteroid dehydrogenase/Delta 5-->4-isomerase type I (3-beta-

|                             |                                                                                                                                       |
|-----------------------------|---------------------------------------------------------------------------------------------------------------------------------------|
| <a href="#">3BHS6_MOUSE</a> | 3 beta-hydroxysteroid dehydrogenase/Delta 5-->4-isomerase type VI (3-beta-hydroxysteroid dehydrogenase/Delta 5-->4-isomerase type VI) |
| <a href="#">3BHS2_MOUSE</a> | 3 beta-hydroxysteroid dehydrogenase/Delta 5-->4-isomerase type II (3-beta-hydroxysteroid dehydrogenase/Delta 5-->4-isomerase type II) |
| <a href="#">CC45L_MOUSE</a> | CDC45-related protein (PORC-PI-1) - Mus musculus (Mouse)                                                                              |
| <a href="#">RAIN_MOUSE</a>  | Ras-interacting protein 1 (Rain) - Mus musculus (Mouse)                                                                               |
| <a href="#">SFRP4_MOUSE</a> | Secreted frizzled-related sequence protein 4 precursor (sFRP-4) (Frizzled-related protein 4)                                          |
| <a href="#">PRAM_MOUSE</a>  | PML-RARA-regulated adapter molecule 1 (PRAM-1) - Mus musculus (Mouse)                                                                 |
| <a href="#">AKA11_RAT</a>   | A-kinase anchor protein 11 (Protein kinase A-anchoring protein 11) (PRKAA11) - Rattus norvegicus (Rat)                                |
| <a href="#">GPR27_MOUSE</a> | Probable G-protein coupled receptor 27 (Super conserved receptor expressed by random cloning) (GPR27) - Mus musculus (Mouse)          |
| <a href="#">FOXK2_MOUSE</a> | Forkhead box protein K2 (Interleukin enhancer-binding factor 1) (Cellular leukemia factor 1) - Mus musculus (Mouse)                   |
| <a href="#">RB_RAT</a>      | Retinoblastoma-associated protein (PP105) (RB) (Fragment) - Rattus norvegicus (Rat)                                                   |
| <a href="#">LPHN1_RAT</a>   | Latrophilin-1 precursor (Calcium-independent alpha-latrotoxin receptor 1) - Rattus norvegicus (Rat)                                   |
| <a href="#">SUCA_MOUSE</a>  | Succinyl-CoA ligase [GDP-forming] subunit alpha, mitochondrial precursor (SUCA) - Mus musculus (Mouse)                                |
| <a href="#">ARMX2_MOUSE</a> | Armadillo repeat-containing X-linked protein 2 - Mus musculus (Mouse)                                                                 |
| <a href="#">DDEF2_MOUSE</a> | Development and differentiation-enhancing factor 2 (Pyk2 C-terminus-associated protein 2) - Mus musculus (Mouse)                      |
| <a href="#">NFH_MOUSE</a>   | Neurofilament triplet H protein (200 kDa neurofilament protein) (Neurofilament H) - Mus musculus (Mouse)                              |
| <a href="#">FCN1_RAT</a>    | Ficolin-1 precursor (Ficolin-A) (Ficolin-alpha) (M-ficolin) (Collagen/fibrinolytic system) - Rattus norvegicus (Rat)                  |
| <a href="#">MYG_RAT</a>     | Myoglobin - Rattus norvegicus (Rat)                                                                                                   |
| <a href="#">LRC8E_MOUSE</a> | Leucine-rich repeat-containing protein 8E - Mus musculus (Mouse)                                                                      |
| <a href="#">GPR27_RAT</a>   | Probable G-protein coupled receptor 27 (Super conserved receptor expressed by random cloning) (GPR27) - Rattus norvegicus (Rat)       |
| <a href="#">RM12_MOUSE</a>  | 39S ribosomal protein L12, mitochondrial precursor (L12mt) (MRP-L12) - Mus musculus (Mouse)                                           |
| <a href="#">ADH1_RAT</a>    | Alcohol dehydrogenase 1 (EC 1.1.1.1) (Alcohol dehydrogenase A subunit) - Rattus norvegicus (Rat)                                      |
| <a href="#">LTBP3_MOUSE</a> | Latent-transforming growth factor beta-binding protein 3 precursor (LTBP3) - Mus musculus (Mouse)                                     |
| <a href="#">AT10D_MOUSE</a> | Probable phospholipid-transporting ATPase VD (EC 3.6.3.1) (ATPVD) - Mus musculus (Mouse)                                              |
| <a href="#">N4BP3_MOUSE</a> | NEDD4-binding protein 3 (N4BP3) - Mus musculus (Mouse)                                                                                |
| <a href="#">CUL7_MOUSE</a>  | Cullin-7 (CUL-7) (p185) (p193) - Mus musculus (Mouse)                                                                                 |
| <a href="#">CHMP6_MOUSE</a> | Charged multivesicular body protein 6 (Chromatin-modifying protein 6) - Mus musculus (Mouse)                                          |
| <a href="#">MAST2_MOUSE</a> | Microtubule-associated serine/threonine-protein kinase 2 (EC 2.7.11.1) - Mus musculus (Mouse)                                         |
| <a href="#">CK060_MOUSE</a> | UPF0360 protein C11orf60 homolog - Mus musculus (Mouse)                                                                               |
| <a href="#">S11L1_RAT</a>   | Signal-induced proliferation-associated 1-like protein 1 (SPA-1-like protein 1) - Rattus norvegicus (Rat)                             |
| <a href="#">S11L1_MOUSE</a> | Signal-induced proliferation-associated 1-like protein 1 - Mus musculus (Mouse)                                                       |
| <a href="#">THIM_MOUSE</a>  | 3-ketoacyl-CoA thiolase, mitochondrial (EC 2.3.1.16) (Beta-ketothiolase) - Mus musculus (Mouse)                                       |
| <a href="#">ATX2_MOUSE</a>  | Ataxin-2 (Spinocerebellar ataxia type 2 protein homolog) - Mus musculus (Mouse)                                                       |
| <a href="#">TGM1_RAT</a>    | Protein-glutamine gamma-glutamyltransferase K (EC 2.3.2.13) (Transglutaminase 1) - Rattus norvegicus (Rat)                            |
| <a href="#">TGM1_MOUSE</a>  | Protein-glutamine gamma-glutamyltransferase K (EC 2.3.2.13) (Transglutaminase 1) - Mus musculus (Mouse)                               |
| <a href="#">WISP1_RAT</a>   | WNT1-inducible-signaling pathway protein 1 precursor (WISP-1) (ELM-1) - Rattus norvegicus (Rat)                                       |
| <a href="#">MEPD_RAT</a>    | Thimet oligopeptidase (EC 3.4.24.15) (Endo-oligopeptidase A) (Endopeptidase) - Rattus norvegicus (Rat)                                |
| <a href="#">LZTS2_MOUSE</a> | Leucine zipper putative tumor suppressor 2 - Mus musculus (Mouse)                                                                     |
| <a href="#">SHE_MOUSE</a>   | SH2 domain-containing adapter protein E - Mus musculus (Mouse)                                                                        |
| <a href="#">3BHS7_MOUSE</a> | 3 beta-hydroxysteroid dehydrogenase type 7 (3 beta-hydroxysteroid dehydrogenase type 7)                                               |
| <a href="#">TLN2_MOUSE</a>  | Talin-2 - Mus musculus (Mouse)                                                                                                        |
| <a href="#">ACES_MOUSE</a>  | Acetylcholinesterase precursor (EC 3.1.1.7) (AChE) - Mus musculus (Mouse)                                                             |
| <a href="#">OSBL1_RAT</a>   | Oxysterol-binding protein-related protein 1 (OSBP-related protein 1) (ORP1) - Rattus norvegicus (Rat)                                 |
| <a href="#">OSBL1_MOUSE</a> | Oxysterol-binding protein-related protein 1 (OSBP-related protein 1) (ORP1) - Mus musculus (Mouse)                                    |
| <a href="#">RAB28_MOUSE</a> | Ras-related protein Rab-28 - Mus musculus (Mouse)                                                                                     |
| <a href="#">PRC1_MOUSE</a>  | Protein regulator of cytokinesis 1 - Mus musculus (Mouse)                                                                             |

## Select Summary Report

[Help](#)

Significance threshold p< 
 Max. number of hits

Standard scoring  MudPIT scoring  Ions score or expect cut-off  Show sub-sets

Show pop-ups  Suppress pop-ups  Sort unassigned  Require bold red

1. [GDF7\\_MOUSE](#) Mass: 47861 Score: 53 Queries matched: 73 emPAI: 0.16  
 Growth/differentiation factor 7 precursor (GDF-7) - Mus musculus (Mouse)

| Query                | Observed | Mr(expt)  | Mr(calc)  | Delta   | Miss | Score | Expect | Rank | Peptide                                      |
|----------------------|----------|-----------|-----------|---------|------|-------|--------|------|----------------------------------------------|
| <a href="#">457</a>  | 841.5600 | 840.5527  | 842.4722  | -1.9195 | 1    | 16    | 5.2    | 10   | R.EIRAQAR.A                                  |
| <a href="#">2744</a> | 650.9300 | 1299.8454 | 1300.6987 | -0.8532 | 0    | 15    | 7.6    | 1    | R.AVTASESSPLALR.R                            |
| <a href="#">3358</a> | 462.2000 | 1383.5782 | 1381.6487 | 1.9294  | 0    | 27    | 0.38   | 1    | R.AAGAGPAWSPGGGGGGR.T <a href="#">3356</a>   |
| <a href="#">5812</a> | 596.4800 | 1786.4182 | 1785.0009 | 1.4172  | 1    | 15    | 5.6    | 5    | R.APGPSALQAAAVPGPRAVR.R                      |
| <a href="#">5832</a> | 597.4000 | 1789.1782 | 1789.8020 | -0.6238 | 0    | 22    | 1      | 3    | R.LGFGWPGGGDGGGTAAEER.A <a href="#">5831</a> |

Table 1. Primers for predictive candidate genes

| Name           | RefSeq ID      | Sense primer (5'-3')   | Anti-sense primer (5'-3') | Amplicon (bp) |
|----------------|----------------|------------------------|---------------------------|---------------|
| <i>Foxj2</i>   | NM_021899.3    | CTCTTGAAGTCCCTGTCCGGT  | CTGCGCCCTGTCTCTGTATA      | 106           |
| <i>Klf3</i>    | NM_008453.5    | CCAAAGGAAGCGCAGGATAC   | CAGGTGCATTTGTACGGCTT      | 123           |
| <i>Mef2a</i>   | NM_001033713.3 | GGGGTGACTIONCCATTCTCCA | CATGTGTCCATCCTCATGCG      | 94            |
| <i>Nobox</i>   | NM_130869.3    | GCCAACCTTCCTCTTCCTCT   | TATGCTGTCACTGCCAGGAA      | 84            |
| <i>Pou3f1</i>  | NM_011141.2    | CAAATTTGGGGTGAGGTGGG   | TAGGATGGGGAGGGAGAACA      | 127           |
| <i>Gapdh</i>   | NM_008084      | ACCCAGAAGACTGTGGATGG   | CACATTGGGGGTAGGAACAC      | 171           |
| <i>Col10a1</i> | NM_009925.4    | GCAGCATTACGACCCAAGATC  | TCTGTGAGCTCCATGATTGC      | 201           |
| <i>Runx2</i>   | NM_001145920   | ACCCAGCCACCTTTACCTAC   | TATGGAGTGCTGCTGGTCTG      | 150           |

**Foxj2**: forkhead box J2; **Klf3/Tef2**: Kruppel-like factor 3; **Mef2a**: myocyte enhancer factor 2A; **Nobox/OG2**: NOBOX oogenesis homeobox; **Pou3f1/Tst-1**: POU domain, class 3, transcription factor 1; **Gapdh**: glyceraldehydes-3-phosphate dehydrogenase; **Col10a1**: type X collagen, alpha 1; **Runx2** : runt-related transcription factor 2;



Table 2. Primers for candidate genes identified by Y1H

| Name                 | RefSeq ID      | Sense primer (5'-3')  | Anti-sense primer (5'-3') | Amplicon (bp) |
|----------------------|----------------|-----------------------|---------------------------|---------------|
| <i>Anxa2</i>         | NM_007585.3    | CTTCCGAAAGCTGATGGTCTG | CACGTCGGTTCCTTTCCTCTT     | 132           |
| <i fn1<="" i=""></i> | NM_001276408.1 | TACCCTTCCACACCCCAATC  | TGCCAGGAAGCTGAATACCA      | 122           |
| <i>Hspa5</i>         | NM_001163434.1 | CCTTGTGTTTGACCTGGGTG  | CCATGACCCGCTGATCAAAG      | 131           |
| <i>Nedd4</i>         | NM_010890      | CATGTGTGGTCTGGGAGATG  | CCAGAACCAGTGGATGACCT      | 100           |
| <i>Psmb1</i>         | NM_011185.3    | AGAATGTAGAGCACGTCCCC  | ATACACATCCCTCTCGGCTG      | 89            |
| <i>Ptgs2</i>         | NM_011198.3    | TGCAGAATTGAAAGCCCTCT  | CCCCAAAGATAGCATCTGGA      | 95            |
| <i>Rab1</i>          | NM_008996.3    | GCCCTTGAACCTCCTGATCCT | GGGCAATCACATTTCTGCT       | 123           |
| <i>Rela</i>          | NM_009045.4    | CACCGGATTGAAGAGAAGCG  | AGTTGAGTTTCGGGTAGGCA      | 132           |
| <i>Rpl35</i>         | NM_025592.3    | CCTGCGACCCAAGAAGACTA  | TCGTTGTCATCTCAGGCCTT      | 138           |
| <i>Rps28</i>         | NM_016844.2    | AAATGTCAAAGGCCCCGTTT  | TTCCGTGGGCTAAGTAGTGG      | 122           |

***Anxa2***: annexin A2; ***Fn1***: fibronectin 1; ***Hspa5***: heat shock protein 5; ***Nedd4***: neural precursor cell expressed, developmentally down-regulated 4; ***Psmb1***: proteasome (prosome, macropain) subunit, beta type 1; ***Ptgs2***: prostaglandin-endoperoxide synthase 2; ***Rab1***: member RAS oncogene family; ***Rela***: v-rel reticuloendotheliosis viral oncogene homolog A (avian); ***Rpl35***: ribosomal protein L35; ***Rps28***: ribosomal protein S28.

Table 3. Primers for candidate genes identified by MS

| Name         | RefSeq ID      | Sense primer (5'-3')  | Anti-sense primer (5'-3') | Amplicon (bp) |
|--------------|----------------|-----------------------|---------------------------|---------------|
| <i>Ddef2</i> | NM_001004364.2 | ATCAAACAGGCCCCAGGATGA | TTCCCGTTCCTCTCTGTTCC      | 179           |
| <i>Foxk2</i> | NM_001080932.2 | TGTGCACTTTCAGGTTTCCG  | GTTGATGGTCAGGGGTGAGA      | 137           |
| <i>Fus</i>   | NM_139149.2    | GAGCTGGAGACTGGAAGTGT  | CCCATATGAGAGCCTCCTGG      | 130           |
| <i>Gdf7</i>  | NM_013527.1    | ATCGCGCCATTAGACTACGA  | GAATGCTGATGGGACTGAGC      | 175           |
| <i>Hnf3a</i> | NM_008259.3    | CTCTCTACCCACCTACGCTG  | ACCTCAGCATGACATGACCA      | 105           |
| <i>N4bp3</i> | NM_145974.3    | TATGAGTTCTCCTGCCCCAC  | GTCGTTCCACATACAGACGC      | 169           |
| <i>Rab28</i> | NM_027295.2    | TCACACTTCCTCCTGCTCTG  | GTGTGGTTCCAAATCGCACT      | 93            |
| <i>Scrt2</i> | NM_001160410.1 | AGCAATTTTGGAGGGTGCTG  | TACTGCTGAAGGTGGGGAAG      | 142           |
| <i>Sfrp4</i> | NM_016687.3    | GGAGTGGTTGCAATGAGGTC  | TGGCAGGAGGAATTGGTGAT      | 109           |
| <i>Tgm1</i>  | NM_001161714.1 | AACAGAAGCACAGATTGGCG  | AACCCGAGAGACACTGACTG      | 139           |

***Ddef2***: Asap2, ArfGAP with SH3 domain, ankyrin repeat and PH domain 2; ***Foxk2***: forkhead box K2; ***Fus***: fused in sarcoma, RNA-binding protein; ***Gdf7***: growth differentiation factor 7; ***Hnf3a (Foxa1)***: forkhead box A1; ***N4bp3***: NEDD4 binding protein 3; ***Rab28***: member RAS oncogene family; ***Scrt2***: scratch homolog 2, zinc finger protein (Drosophila); ***Sfrp4***: secreted frizzled-related protein 4; ***Tgm1***: transglutaminase 1, K polypeptide;
